# Supplementary material
Source: MDPI journal article supplement (https://www.mdpi.com/2076-3417/10/11/3895)
Supplement: s1 [file s1]

## Spectrophotometric determination of trace concentrations of copper in waters using the chromogenic reagent 4-amino-3-mercapto-6-[2-(2-thienyl)vinyl]-1,2,4-triazin-5(4H)-one: Synthesis, characterization, and analytical applications.

Salman. S. Alharthi<sup>A</sup> and Hamed. M. Al-Saidi<sup>B\*</sup>.

<sup>A</sup> Department of Chemistry, Faculty of Science, Taif University, P.O. BOX 7685, Taif 21944, Saudi Arabia.

<sup>B</sup> Department of Chemistry, University College in Al – Jamoum, Umm Al-Qura University, 21955, Makkah, KSA.

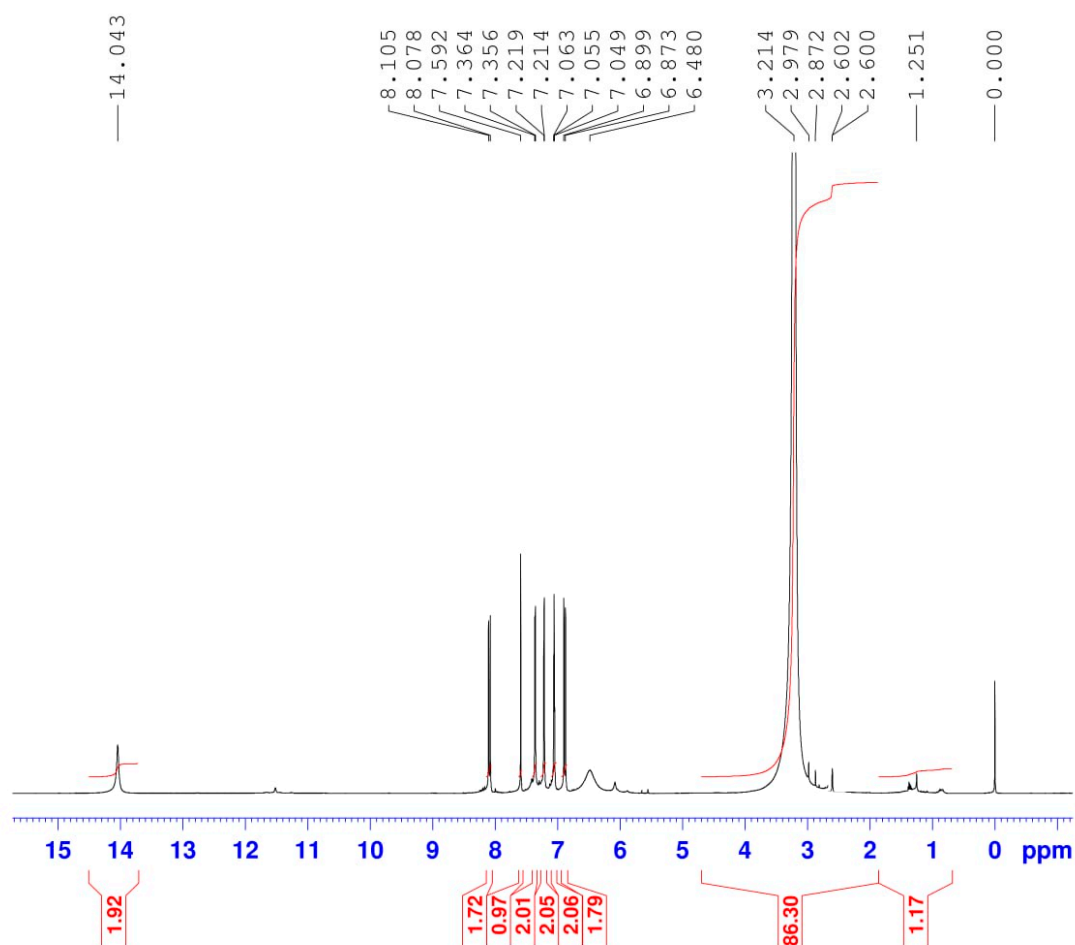

Figure 1. <sup>1</sup>H NMR spectrum of AMT ligand.

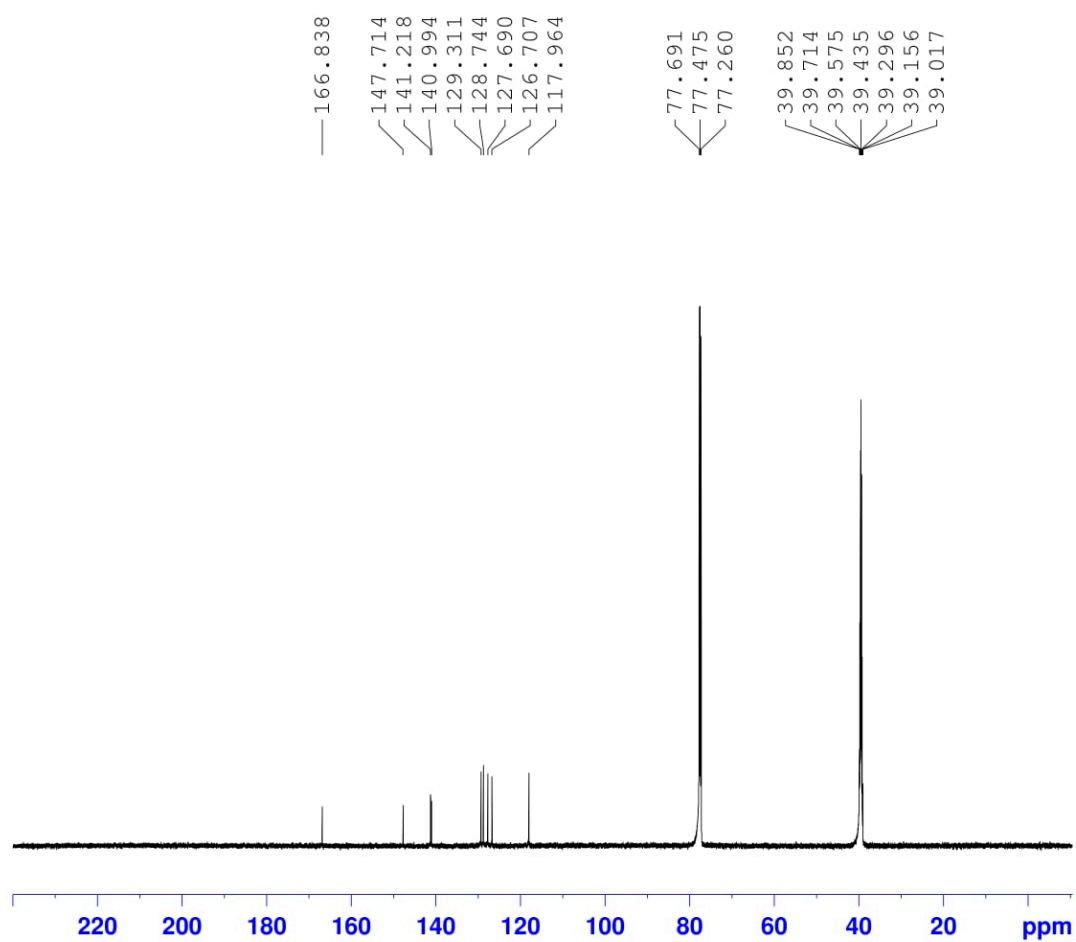

Figure S2 <sup>13</sup>C NMR spectrum of AMT ligand

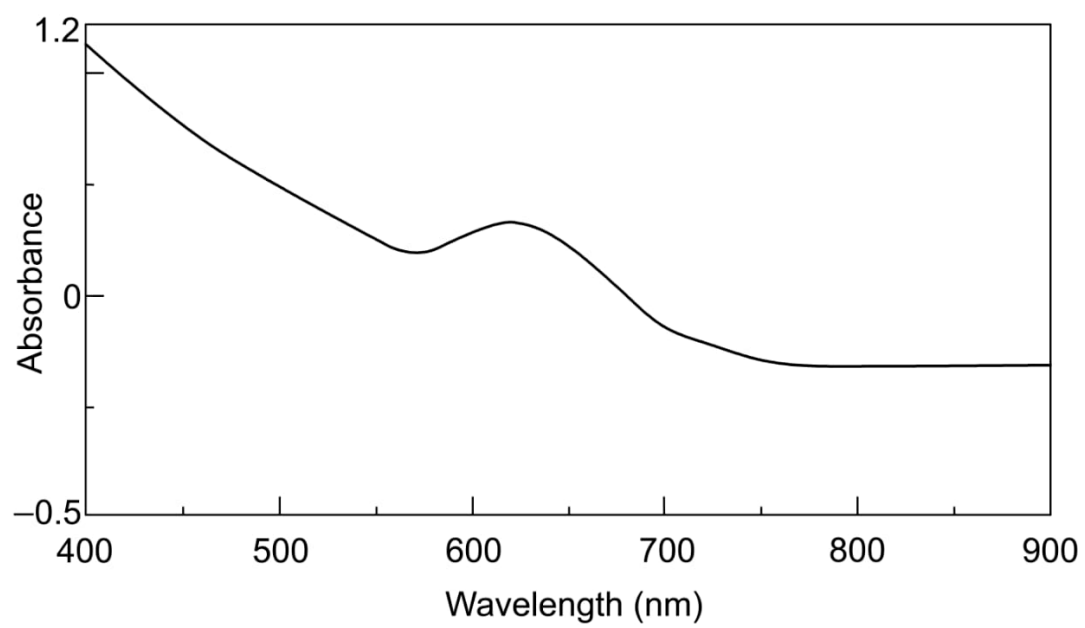

**Figure S3.** The electronic spectrum of [Cu(L)(NO<sub>3</sub>)(H<sub>2</sub>O)<sub>2</sub>]·H<sub>2</sub>O.
